# Supplementary material for: A green, mild and efficient one-pot method for the synthesis of sulfonamides from thiols and disulfides in water
Source: Royal Society of Chemistry journal article supplement (doi:10.1039/c2ra20418e), 2012-01-01

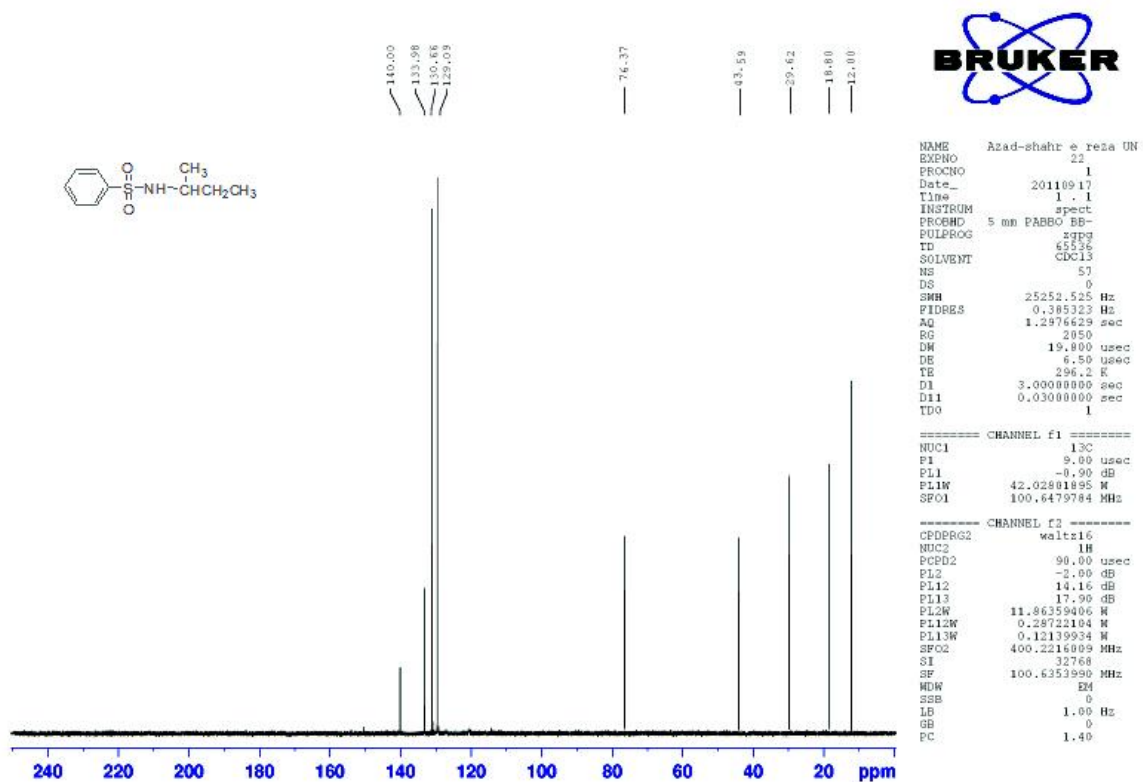

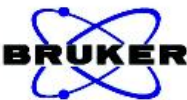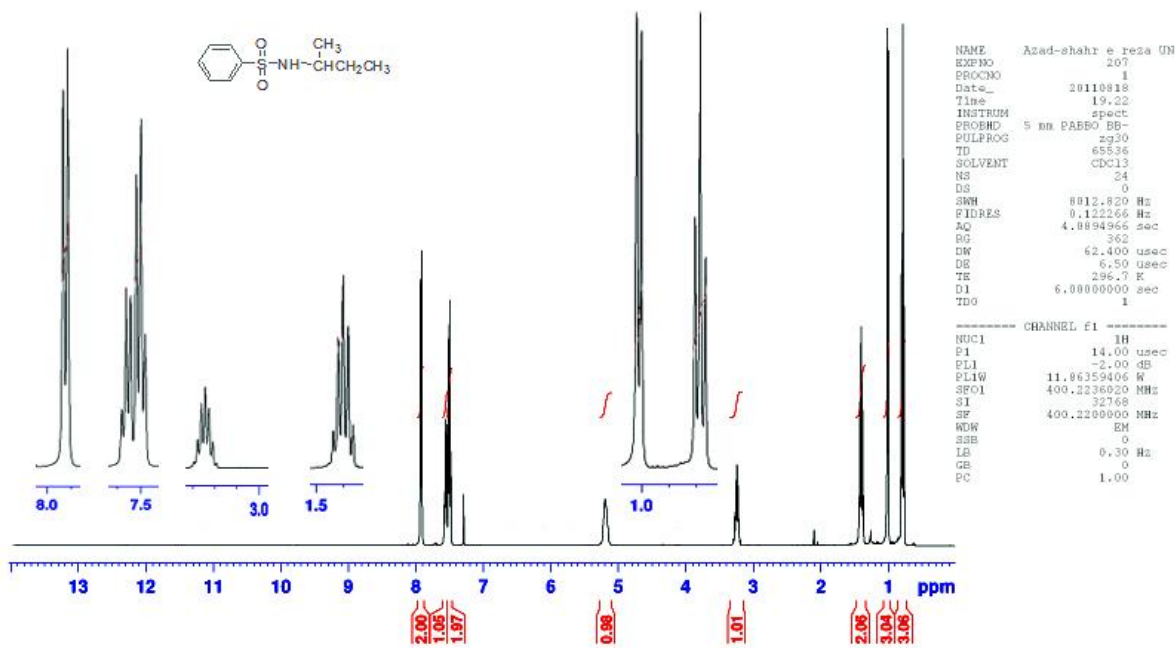

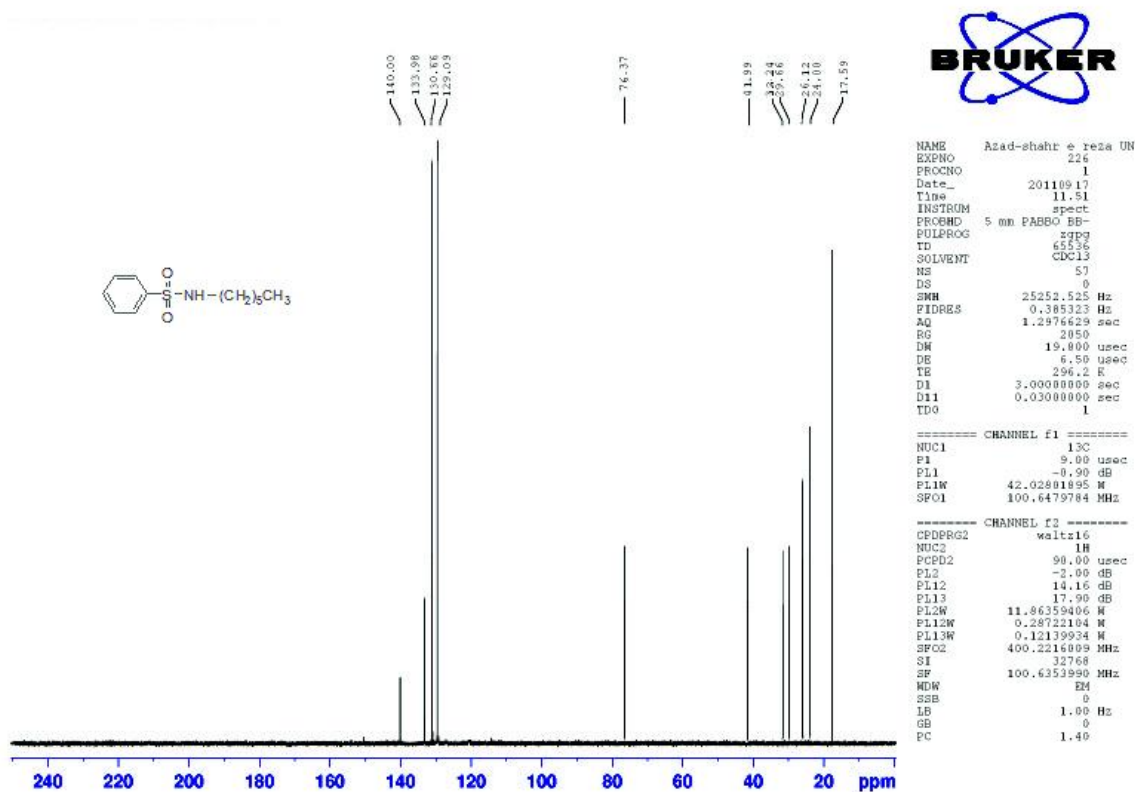

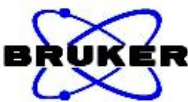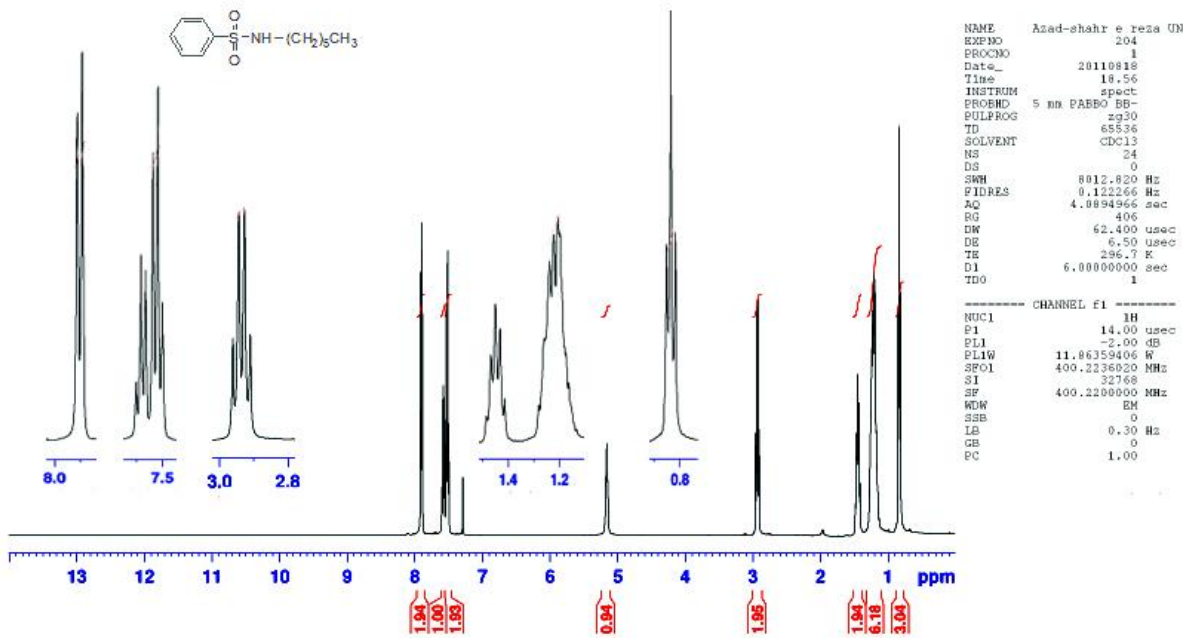

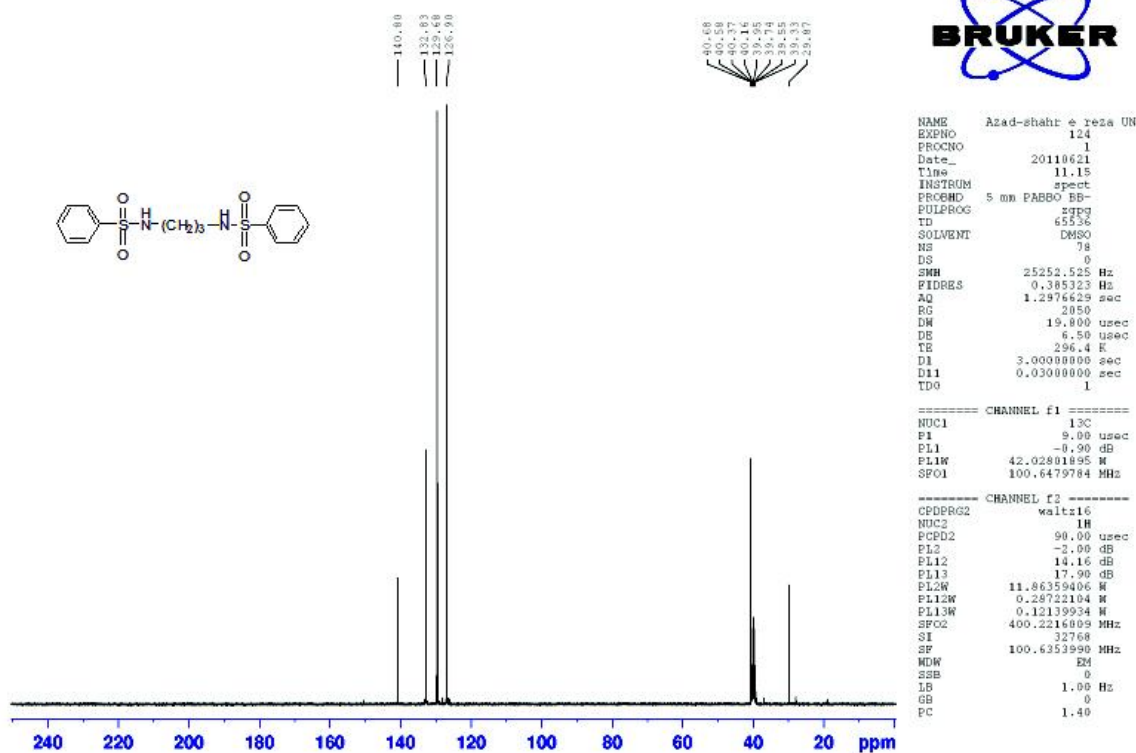

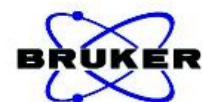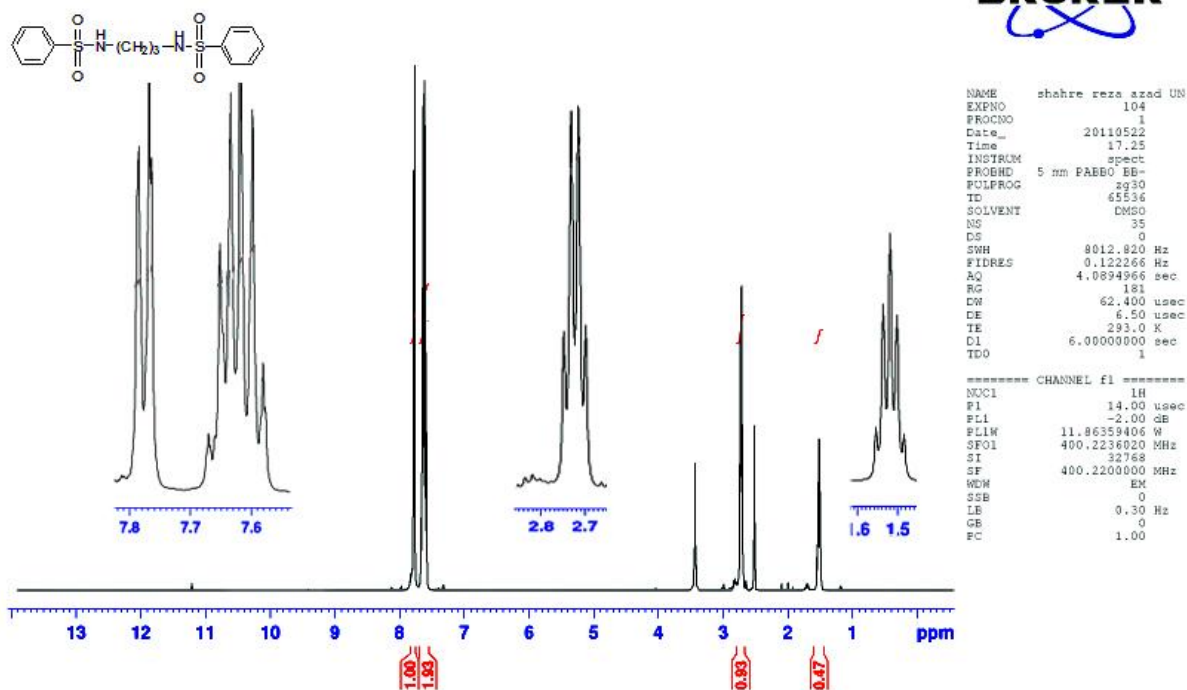

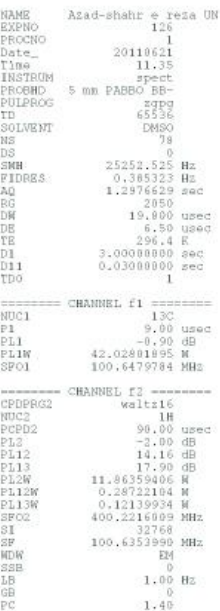

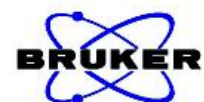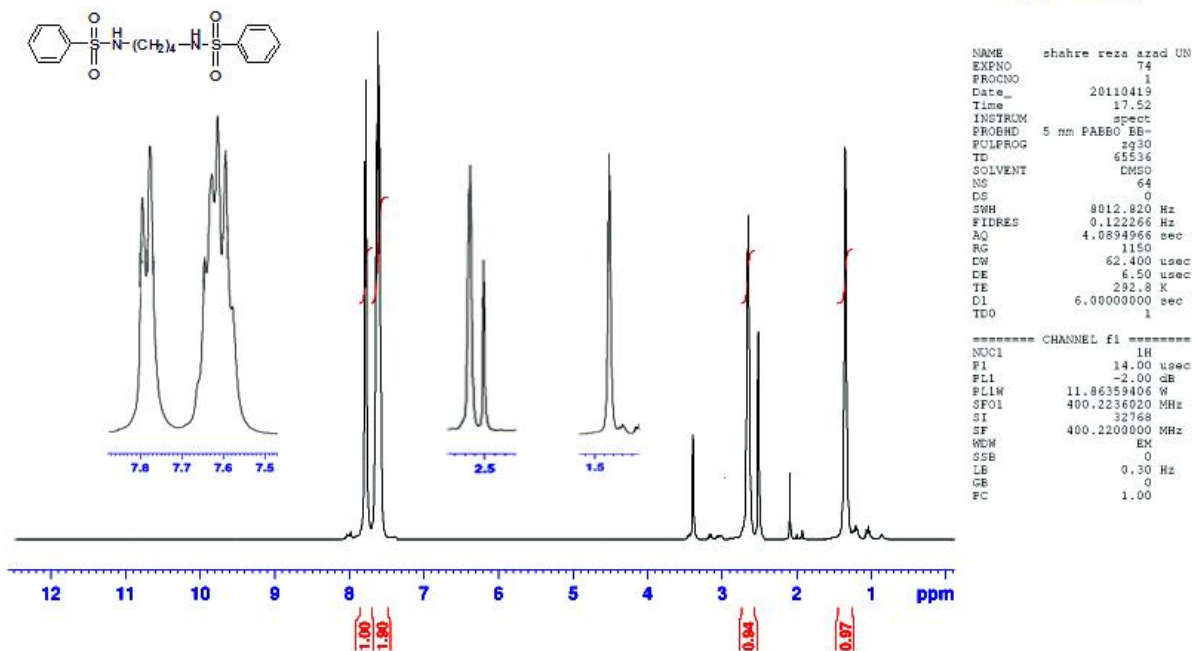



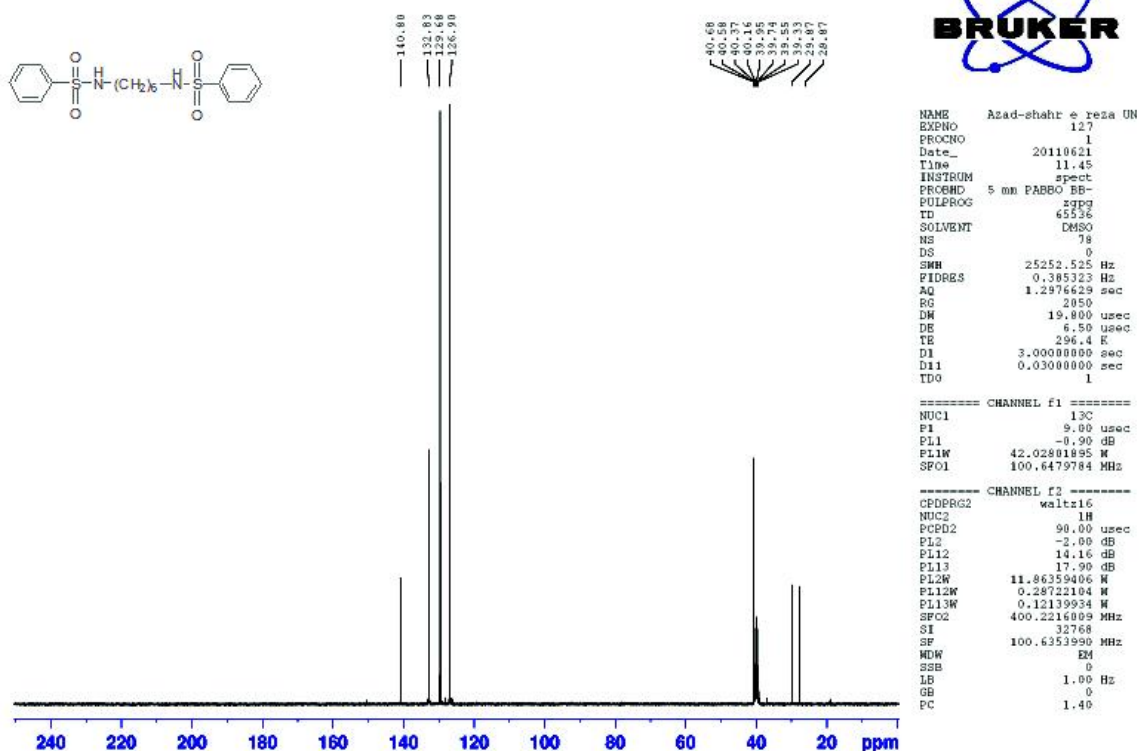

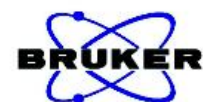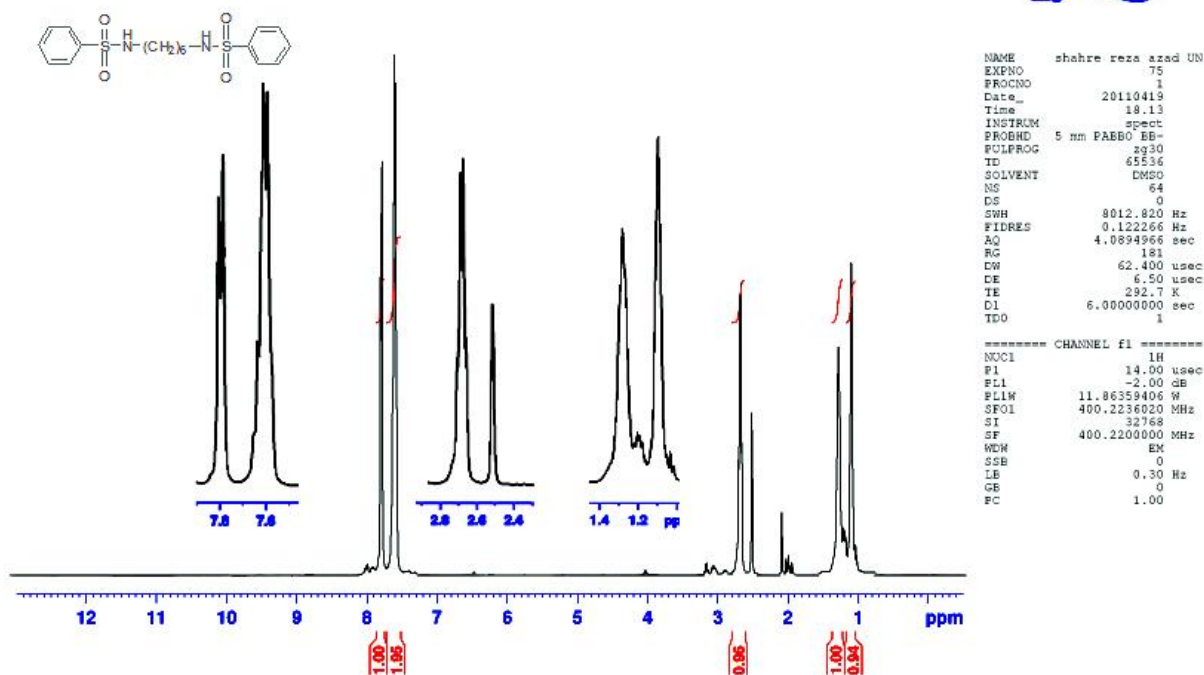

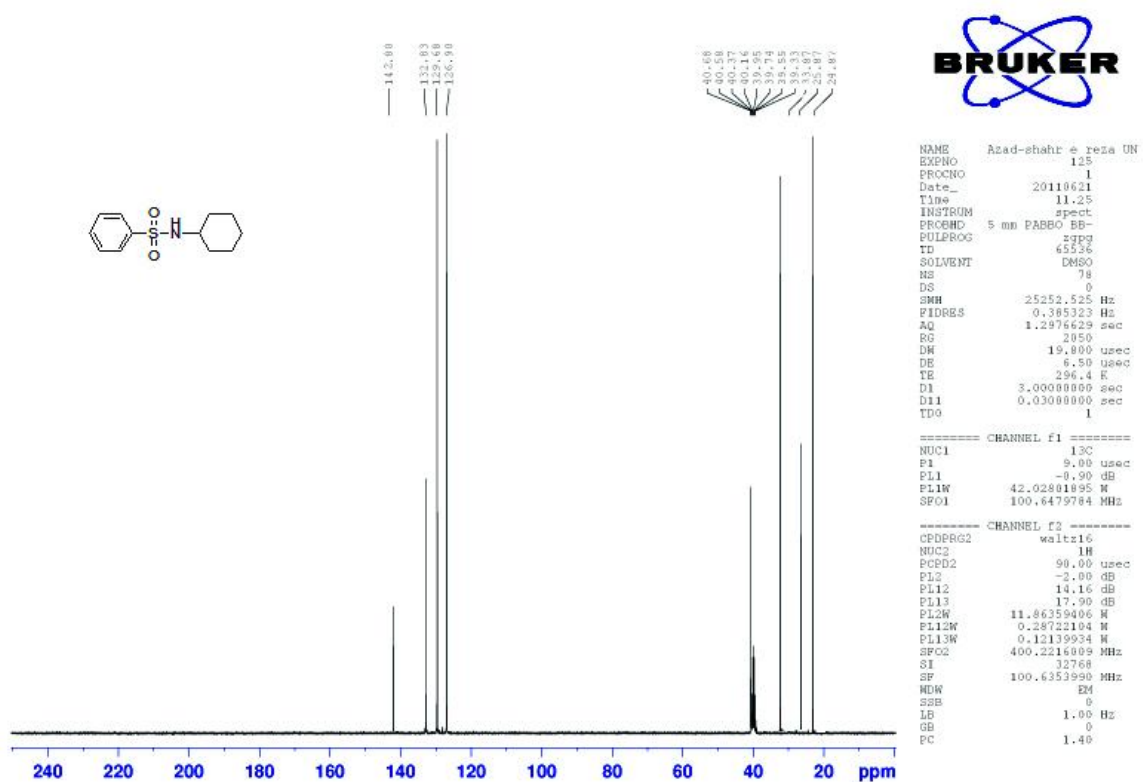

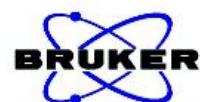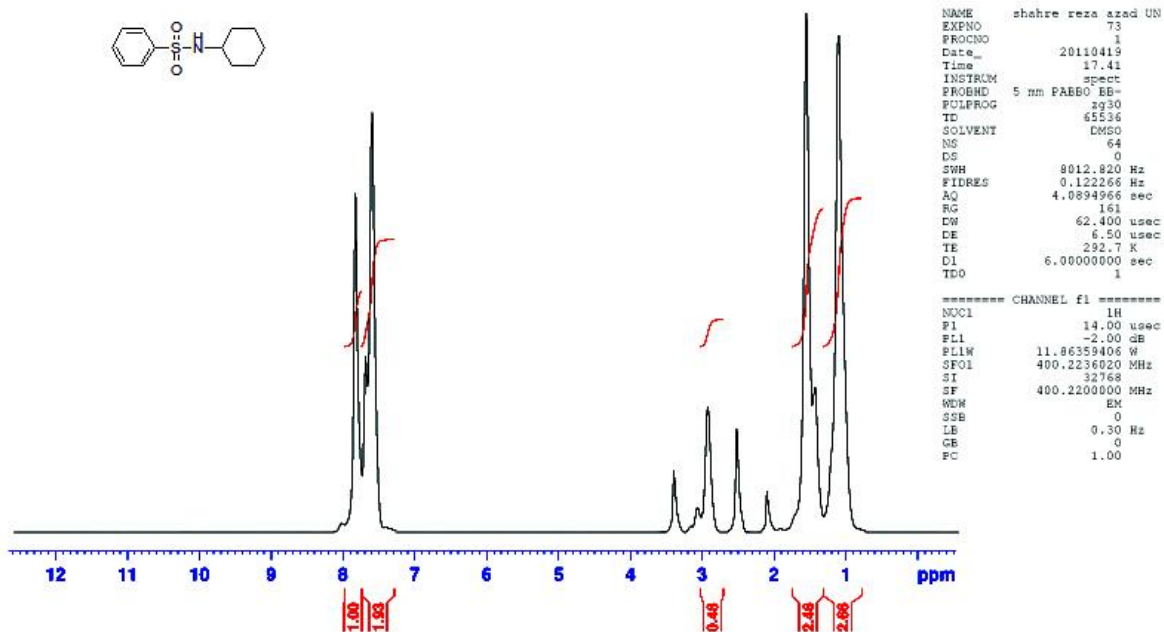

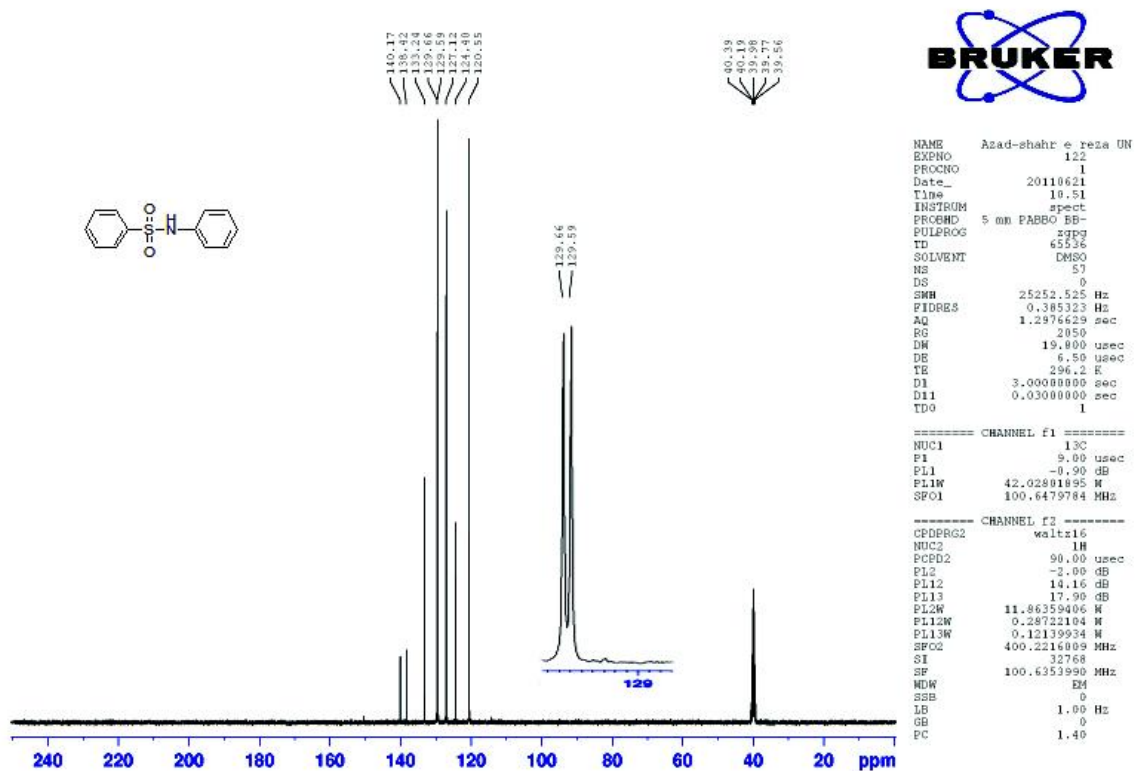

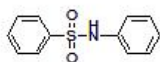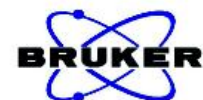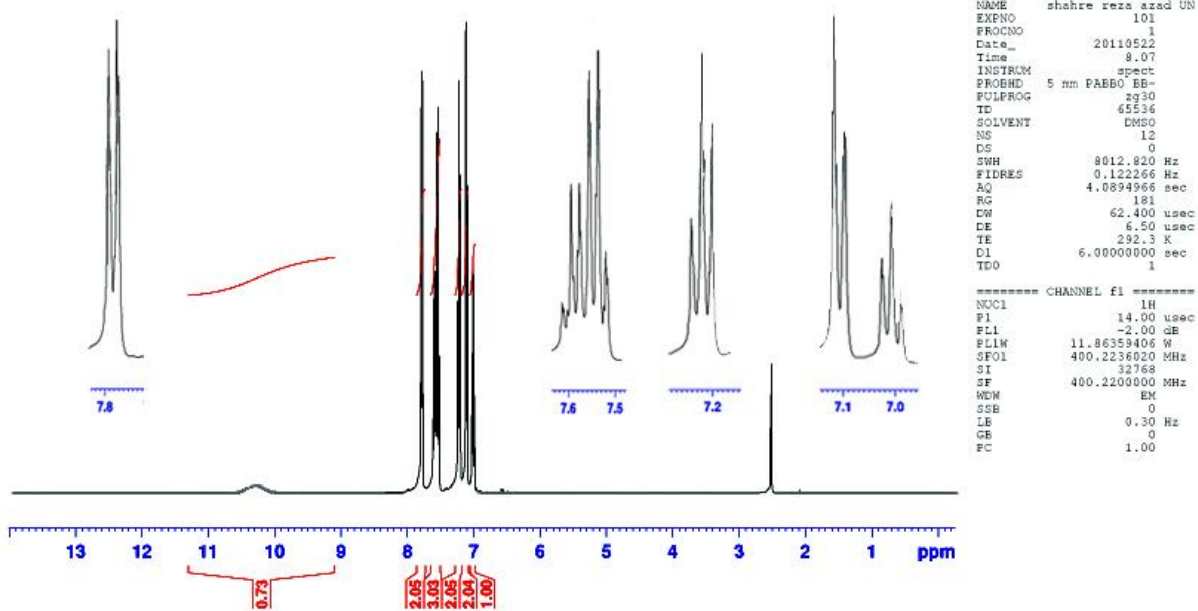

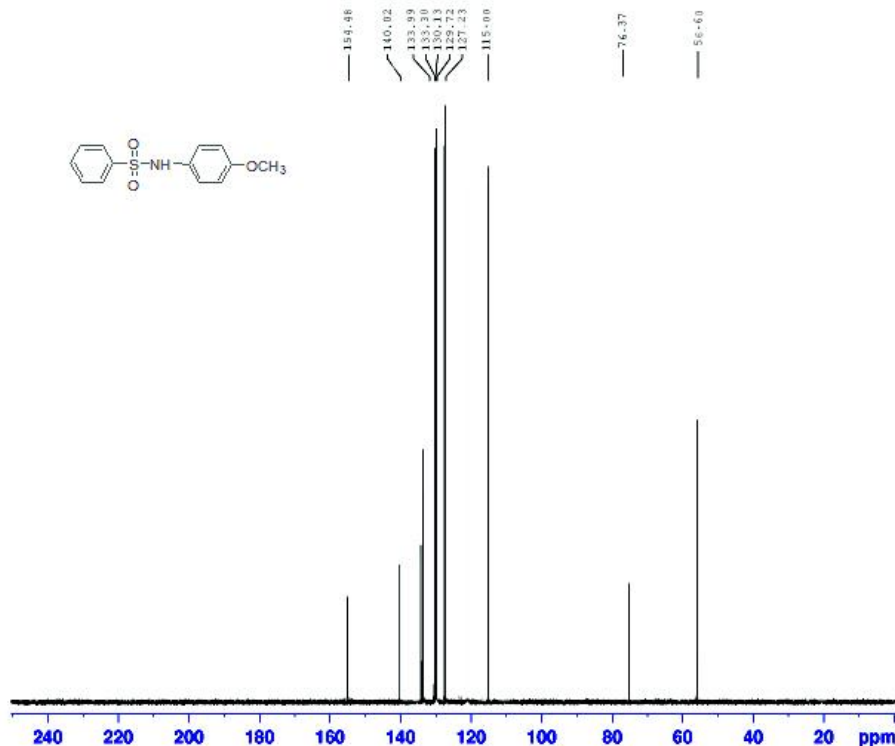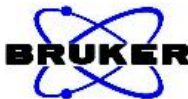

NAME Azad-shahr e reza UN  
EXPNO 221  
PROCNO 1  
Date\_ 20110917  
Time 18:47  
INSTRUM spect  
PROBHD 5 mm PABBO BB-  
PULPROG zgpg  
TD 65536  
SOLVENT CDCl3  
NS 50  
DS 0  
SWH 25252.525 Hz  
FIDRES 0.385323 Hz  
AQ 1.2976629 sec  
RG 2050  
DM 19.800 usec  
DE 6.50 usec  
TE 296.4 K  
D1 3.0000000 sec  
D11 0.0300000 sec  
TD0 1

===== CHANNEL f1 =====  
NUC1 13C  
P1 9.00 usec  
PL1 -0.90 dB  
PL1W 42.02801895 W  
SFO1 100.6479784 MHz

===== CHANNEL f2 =====  
CPDPRG2 waltz16  
NUC2 1H  
PCPD2 90.00 usec  
PL2 -2.00 dB  
PL12 14.16 dB  
PL13 17.90 dB  
PL2W 11.86359406 W  
PL12W 0.28722104 W  
PL13W 0.12139934 W  
SFO2 400.2214809 MHz  
SI 32768  
SF 100.6353990 MHz  
WDW EM  
SSB 0  
LB 1.00 Hz  
GB 0  
PC 1.40

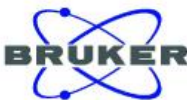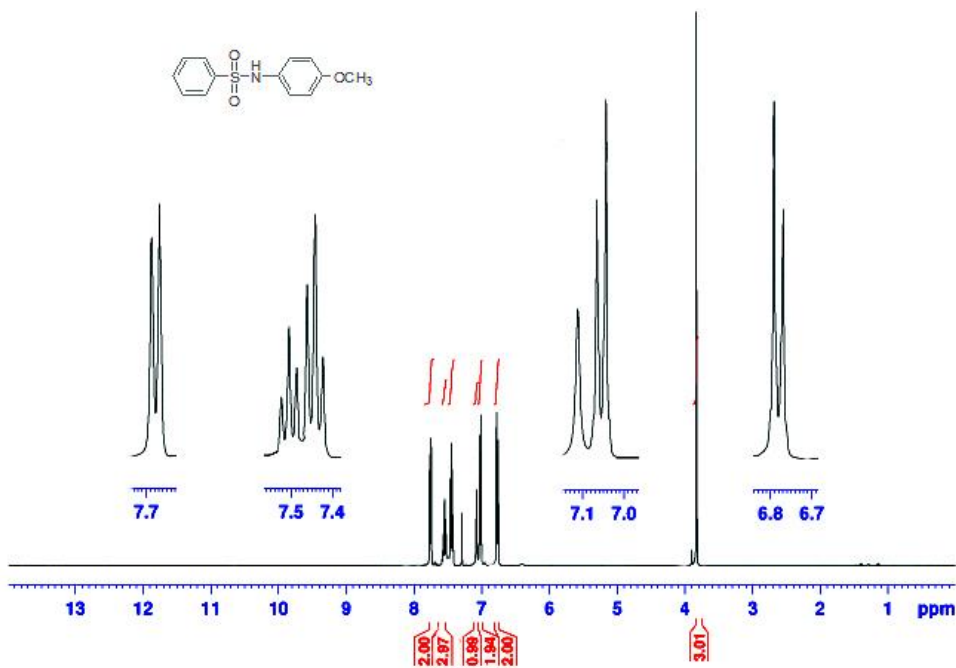

NAME Azad-shahr e reza (N)  
EXPNO 1  
PROCNO 1  
Date\_ 20110818  
Time 19.04  
INSTRUM spect  
PROBHD 5 mm PABBO BB-  
PULPROG zg30  
TD 65536  
SOLVENT CDCl3  
NS 24  
DS 0  
SWH 8012.820 Hz  
FIDRES 0.122266 Hz  
AQ 4.0894966 sec  
RG 1150  
DW 62.400 usec  
DE 6.50 usec  
TE 296.8 K  
D1 6.00000000 sec  
TD0 1

CHANNEL f1  
NUC1 1H  
P1 14.00 usec  
PL1 -2.00 dB  
PL1W 11.86359406 W  
SFO1 400.2236020 MHz  
SI 32768  
SF 400.2200000 MHz  
WDW EM  
SSB 0  
LB 0.30 Hz  
GB 0  
PC 1.00



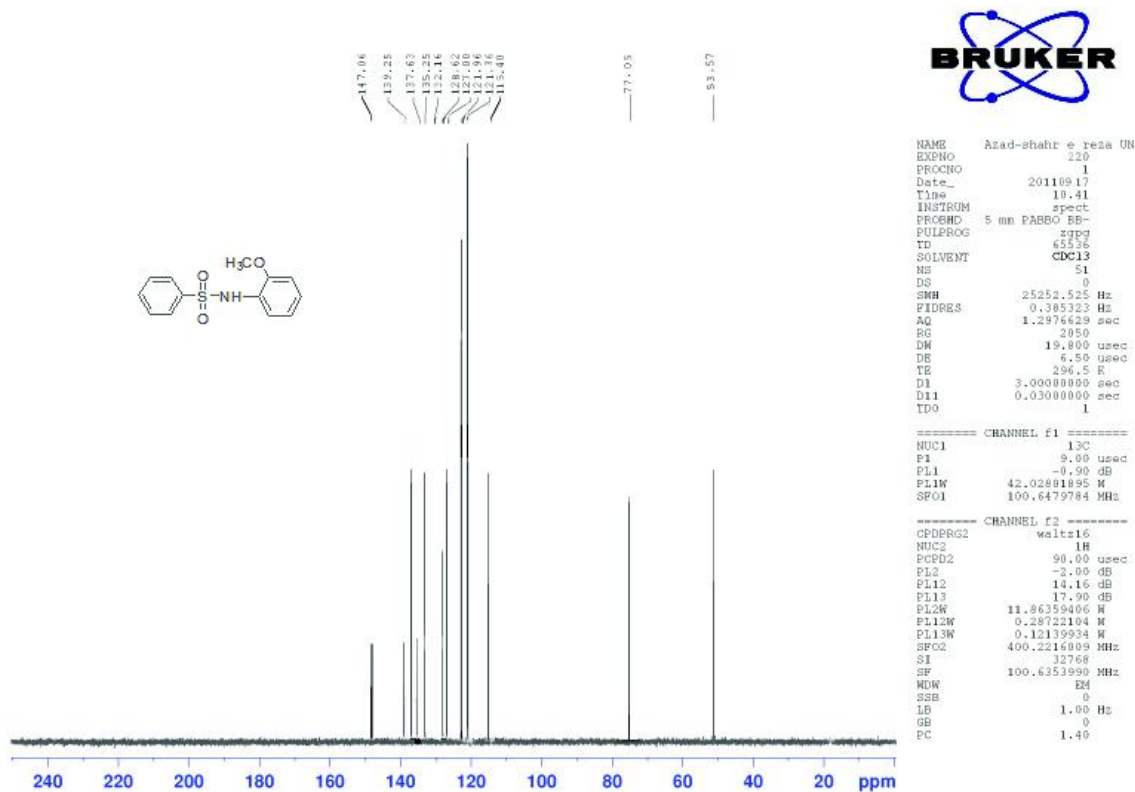

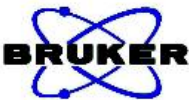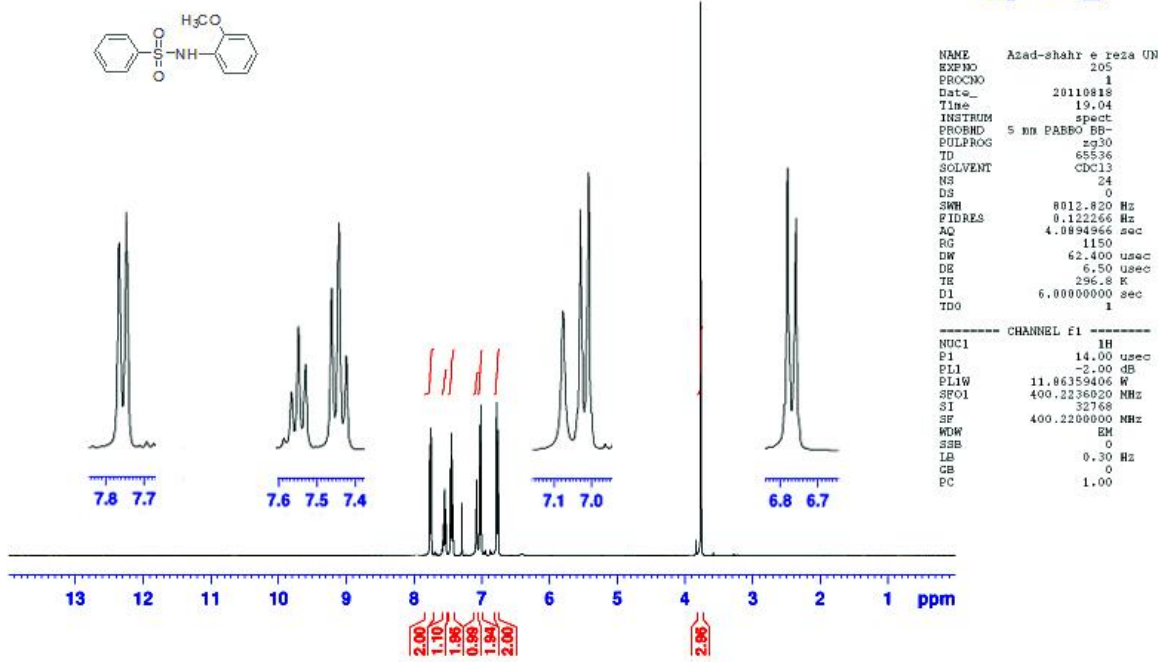

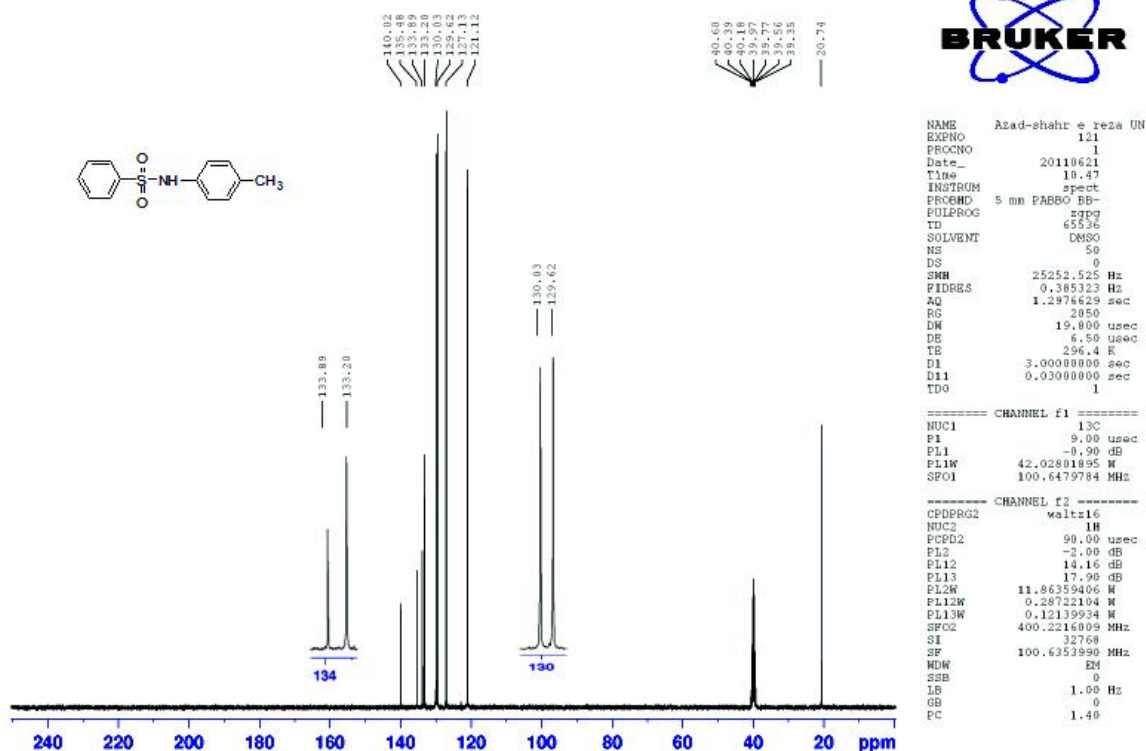

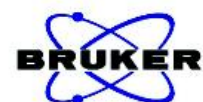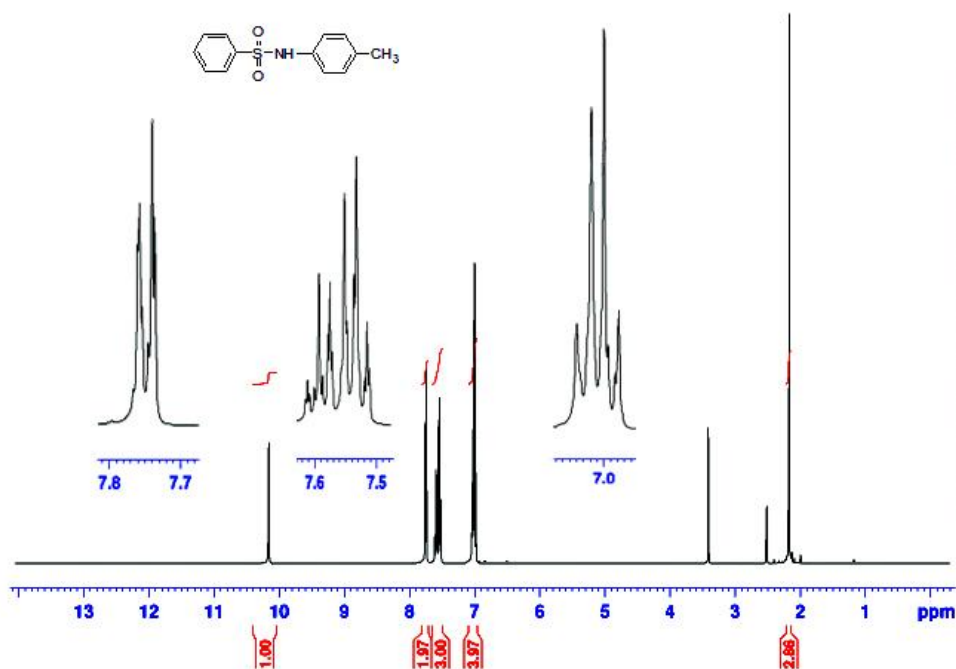

```

NAME      shahre reza azad UN
EXPNO     1
PROCNO    1
Date_     20110522
Time      8.14
INSTRUM   spect
PROBHD    5 mm PABBO BB-
PULPROG   zg30
TD         65536
SOLVENT   DMSO
NS         19
DS         0
SWH        8012.820 Hz
FIDRES     0.122266 Hz
AQ         4.0894966 sec
RG         181
RG         181
CW         62.400 usec
CE         6.50 usec
TE         292.5 K
D1         6.0000000 sec
TD0        1
===== CHANNEL f1 =====
NUC1       1H
P1         14.00 usec
PL1        -2.00 dB
PL1W       11.86359406 W
SFO1       400.2236020 MHz
SI         32768
SF         400.2200000 MHz
WDW        EM
SSB        0
LB         0.30 Hz
GB         0
PC         1.00
    
```

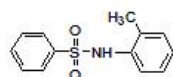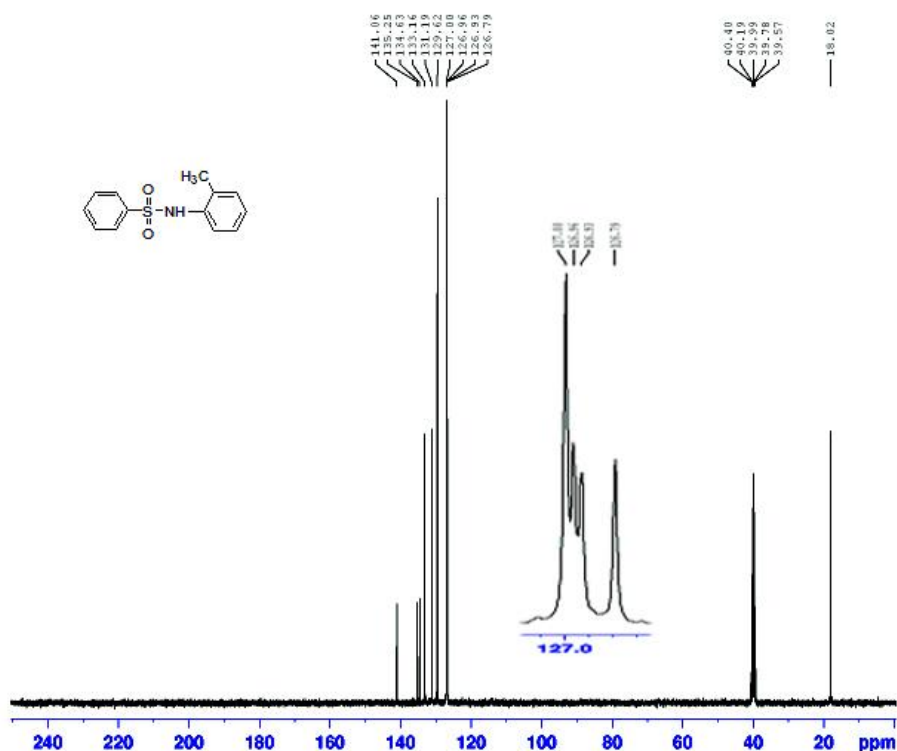

|         |                      |
|---------|----------------------|
| NAME    | Azad-shahr-e Reza UN |
| EXPNO   | 120                  |
| PROCNO  | 1                    |
| Date_   | 20110621             |
| Time    | 10.41                |
| INSTRUM | spect                |
| PROBHD  | 5 mm PABBO BB-       |
| PULPROG | zgpg                 |
| TD      | 65536                |
| SOLVENT | DMSO                 |
| NS      | 51                   |
| DS      | 0                    |
| SWH     | 25252.52 Hz          |
| FIDRES  | 0.385323 Hz          |
| AQ      | 1.2976629 sec        |
| RG      | 2050                 |
| DM      | 19.800 usec          |
| DE      | 6.50 usec            |
| DI      | 296.5 K              |
| D1      | 3.00000000 sec       |
| D11     | 0.03000000 sec       |
| TDQ     | 1                    |

```
===== CHANNEL f1 =====
NUC1                13C
F1                   9.00  usec
PL1                  -0.90  dB
PL1W                 42.02801895 W
SPO1                 100.6479784  MHz
```

```

----- CHANNEL f2 -----
CFDPRG2      wait:16
NOC1         1M
CFPD2        90.00 usec
PI2          -3.00 dB
PI12         14.16 dB
PI13         17.90 dB
PI1W         11.86359406 W
PI12W        0.28722104 W
PI13W        0.12139934 W
SFO2         400.2216009 MHz
SI           32768
MF           100.6353990 MHz
SDW          EM
SSB          0
LB           1.00 Hz
GB           0

```

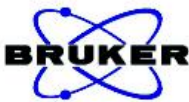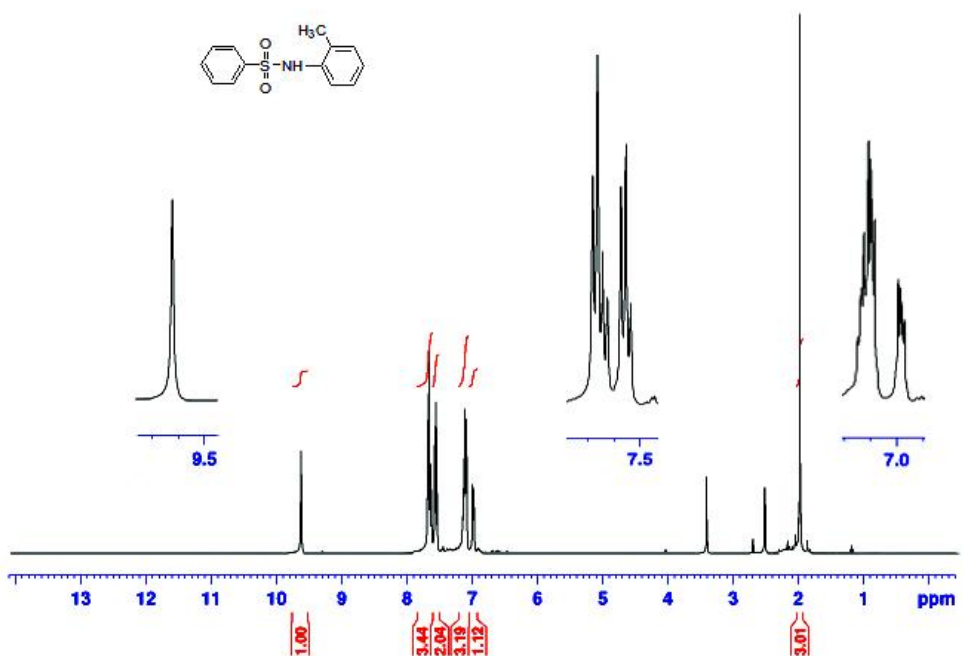

NAME shahre reza azad UN  
EXPNO 100  
PROCNO 1  
Date\_ 20110522  
Time 7.56  
INSTRUM spect  
PROBHD 5 mm PABBO BB-  
PULPROG zg30  
TD 65536  
SOLVENT DMSO  
NS 25  
DS 0  
SWH 8012.820 Hz  
FIDRES 0.122266 Hz  
AQ 4.0894966 sec  
RG 181  
CW 62.400 usec  
DE 6.50 usec  
TE 292.2 K  
D1 6.00000000 sec  
TD0 1

===== CHANNEL f1 =====  
NUC1 1H  
P1 14.00 usec  
PL1 -2.00 dB  
PL1W 11.86359406 W  
SFOL 400.2236020 MHz  
SI 32768  
SF 400.2200000 MHz  
WCH EM  
SSB 0  
LB 0.30 Hz  
GB 0  
PC 1.00

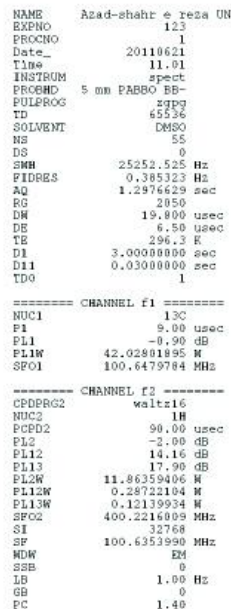

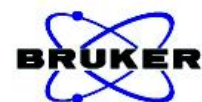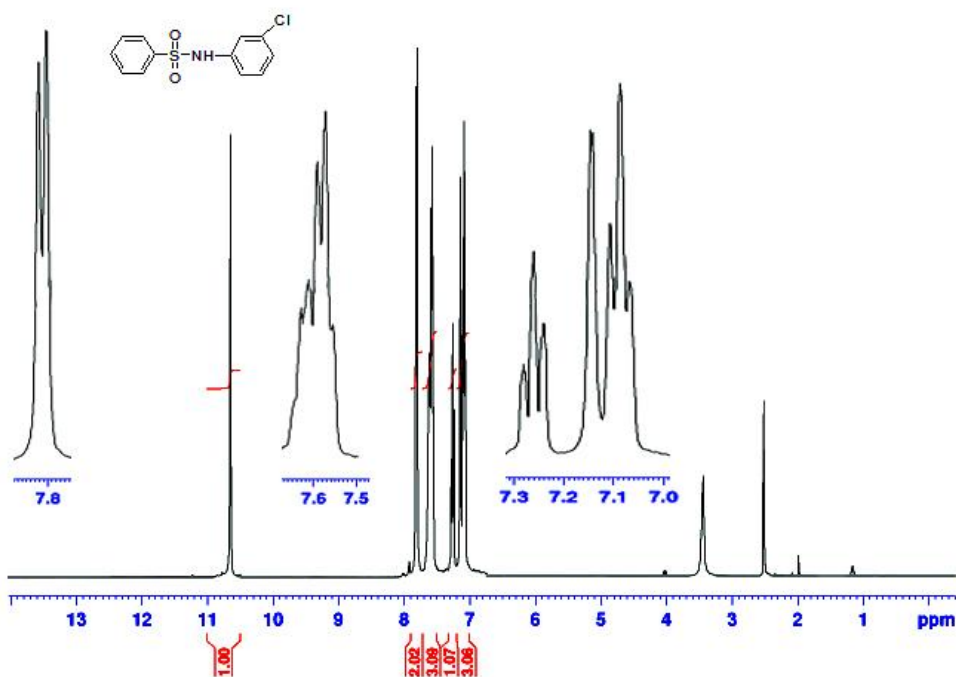

```

NAME      shahre reza azad UN
EXPNO     103
PROCNO    1
Date_     20110522
Time      8.21
INSTRUM   spect
PROBHD    5 mm PABBO BB-
PULPROG   zg30
TD         65536
SOLVENT   DMSO
NS         27
DS         0
SWH        8012.820 Hz
FIDRES     0.122266 Hz
AQ         4.0894966 sec
RG         181
CW         62.400 usec
DE         6.50 usec
TE         292.4 K
D1         6.00000000 sec
TD0        1

===== CHANNEL f1 =====
NUC1       1H
P1         14.00 usec
PL1        -2.00 dB
PL1W       11.86359406 W
SFO1       400.2236020 MHz
SI         32768
SF         400.2200000 MHz
WDW        EM
SSB        0
LB         0.30 Hz
GB         0
PC         1.00
    
```



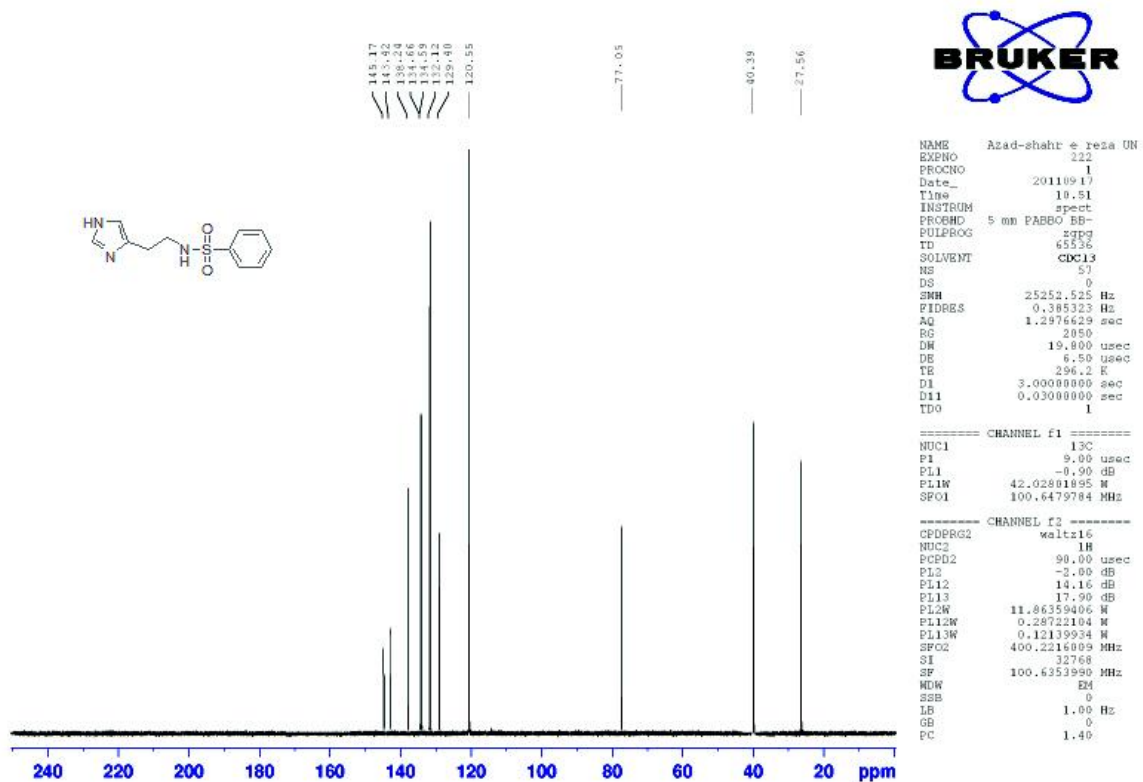

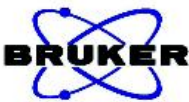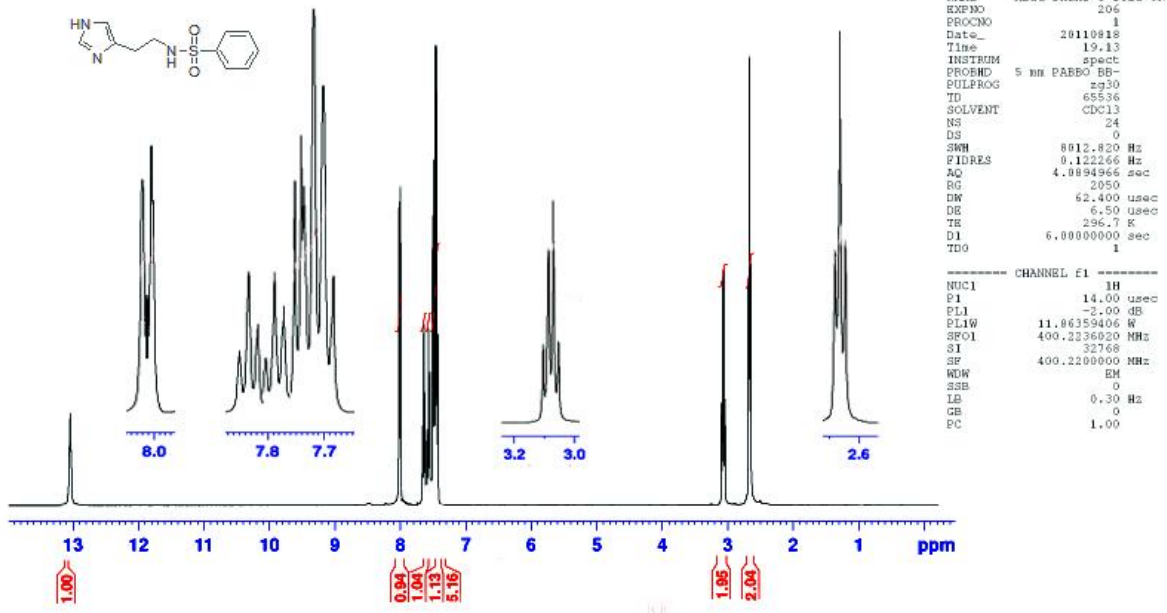

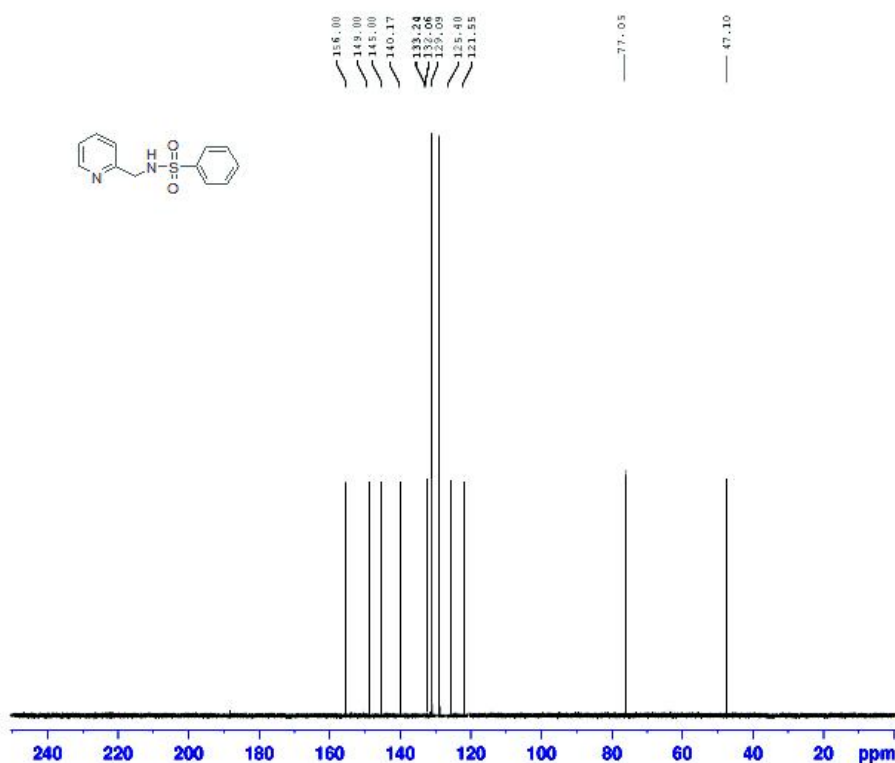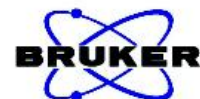

NAME Azad-shahr e reza UN  
EXPNO 122  
PROCNO 1  
Date\_ 20110711  
Time 10.51  
INSTRUM spect  
PROBHD 5 mm PABBO BB-  
PULPROG zgpg  
TD 65536  
SOLVENT CDCl3  
NS 57  
DS 0  
SWH 25252.525 Hz  
FIDRES 0.385323 Hz  
AQ 1.2976629 sec  
RG 2050  
DM 19.800 usec  
DE 6.50 usec  
TE 296.2 K  
D1 3.00000000 sec  
D11 0.03000000 sec  
TD0 1

===== CHANNEL f1 =====  
NUC1 13C  
P1 9.00 usec  
PL1 -0.90 dB  
PL1W 42.02801895 W  
SFO1 100.6479784 MHz

===== CHANNEL f2 =====  
CFDPFG2 waitz16  
NUC2 1H  
PCPD2 90.00 usec  
PL2 -2.00 dB  
PL12 14.16 dB  
PL13 17.90 dB  
PL2W 11.86359406 W  
PL12W 0.28722104 W  
PL13W 0.12139934 W  
SFO2 400.2216009 MHz  
SI 32768  
SF 100.6351990 MHz  
MDW EM  
S2B 0  
LB 1.00 Hz  
GB 0  
PC 1.40

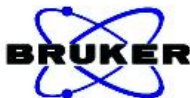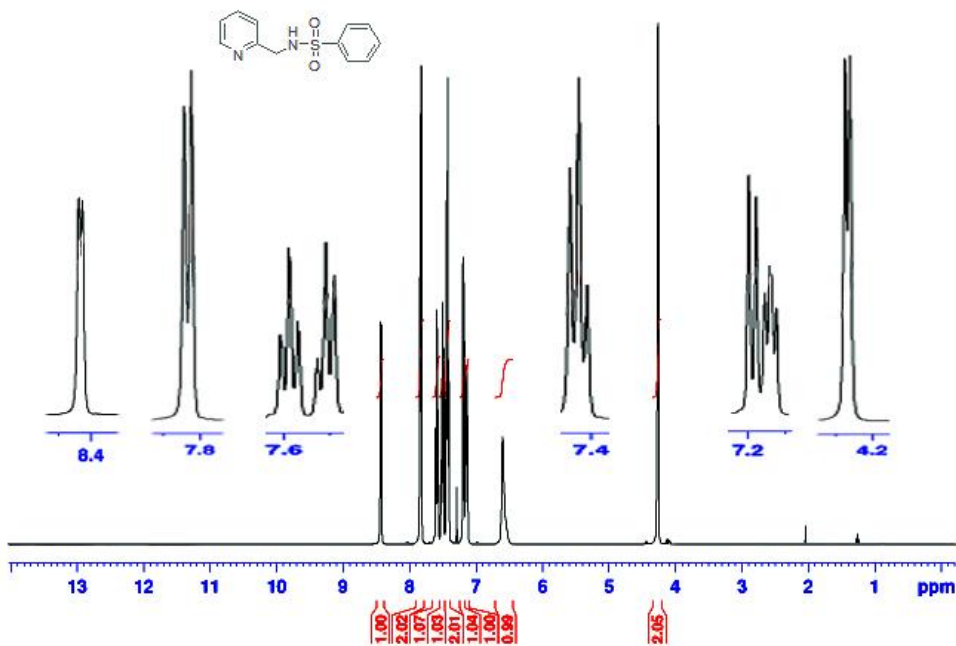

NAME Azad-shahr e reza UN  
EXPNO 128  
PROCNO 1  
Date\_ 20110702  
Time 10.17  
INSTRUM spect  
PROBHD 5 mm PABBO BB-  
PULPROG zg30  
TD 65536  
SOLVENT CDCl3  
NS 32  
DS 0  
SWH 8012.820 Hz  
FIDRES 0.122266 Hz  
AQ 4.0894966 sec  
RG 181  
DW 62.400 usec  
DE 6.50 usec  
TE 295.5 K  
D1 6.00000000 sec  
TDO 1

CHANNEL F1

NUC1 1H  
P1 14.00 usec  
PL1 -2.00 dB  
PL1W 11.86359406 W  
SFO1 400.2236020 MHz  
SI 32768  
SF 400.2200000 MHz  
WDW EM  
SSB 0  
LB 0.30 Hz  
GB 0  
PC 1.00

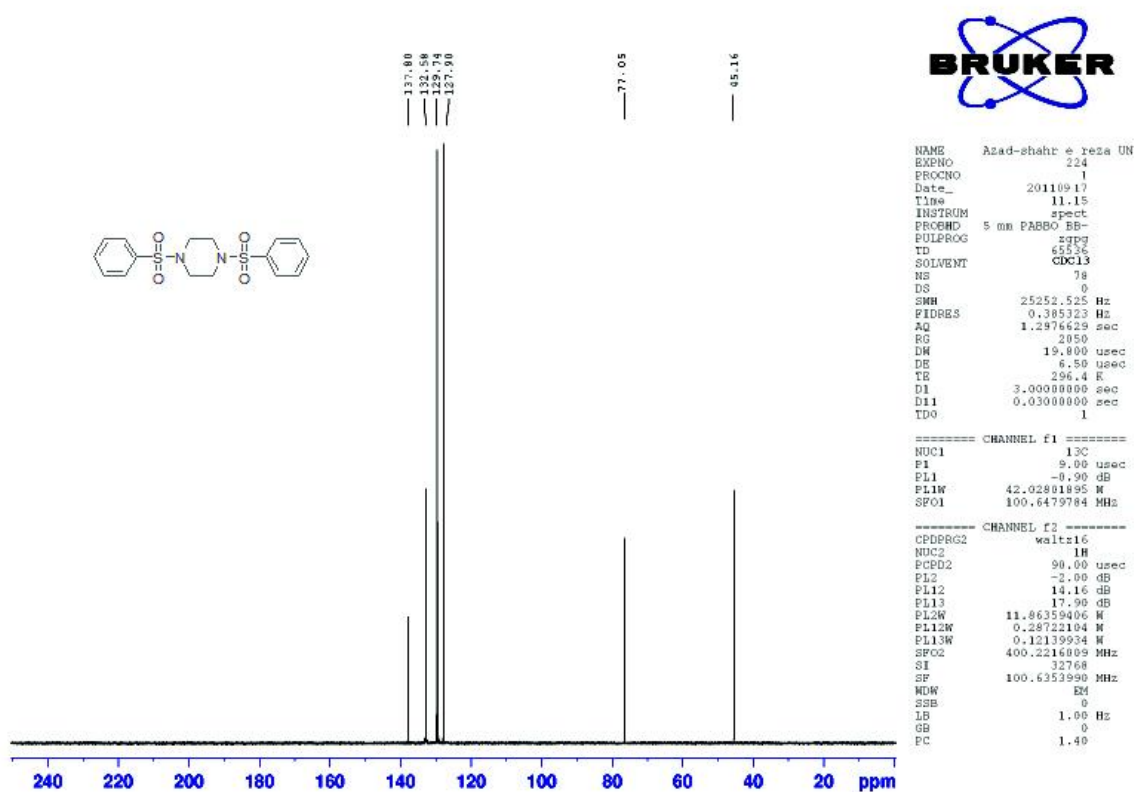

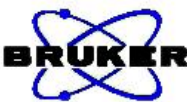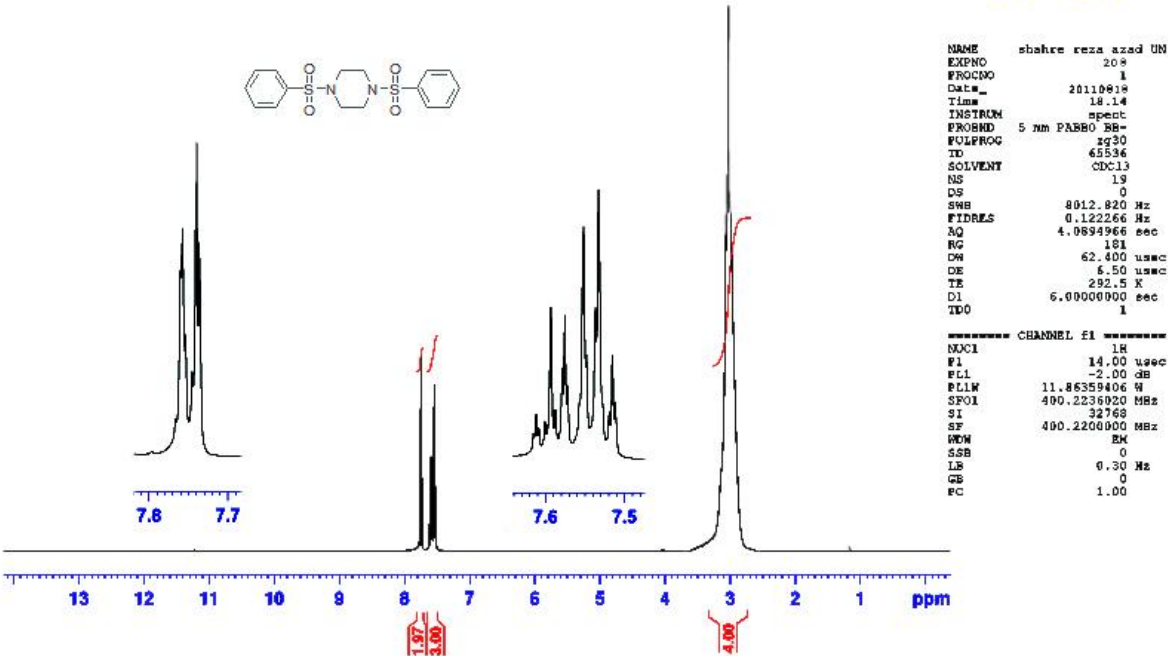

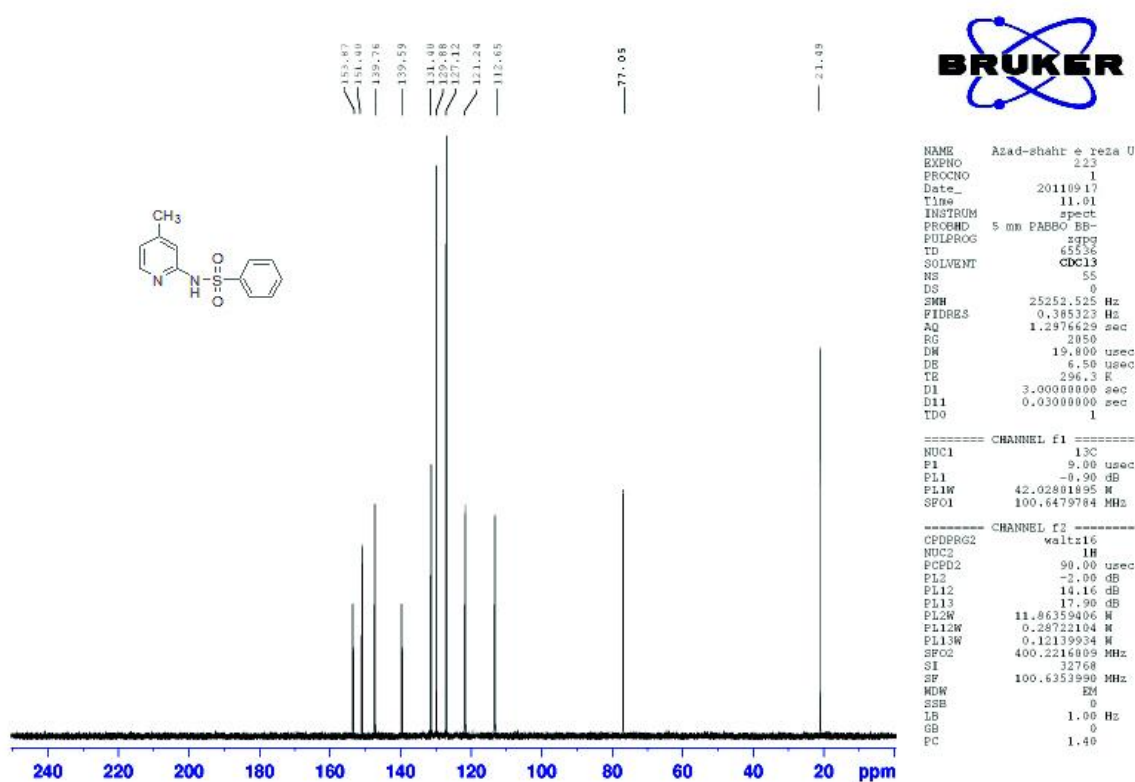

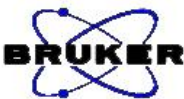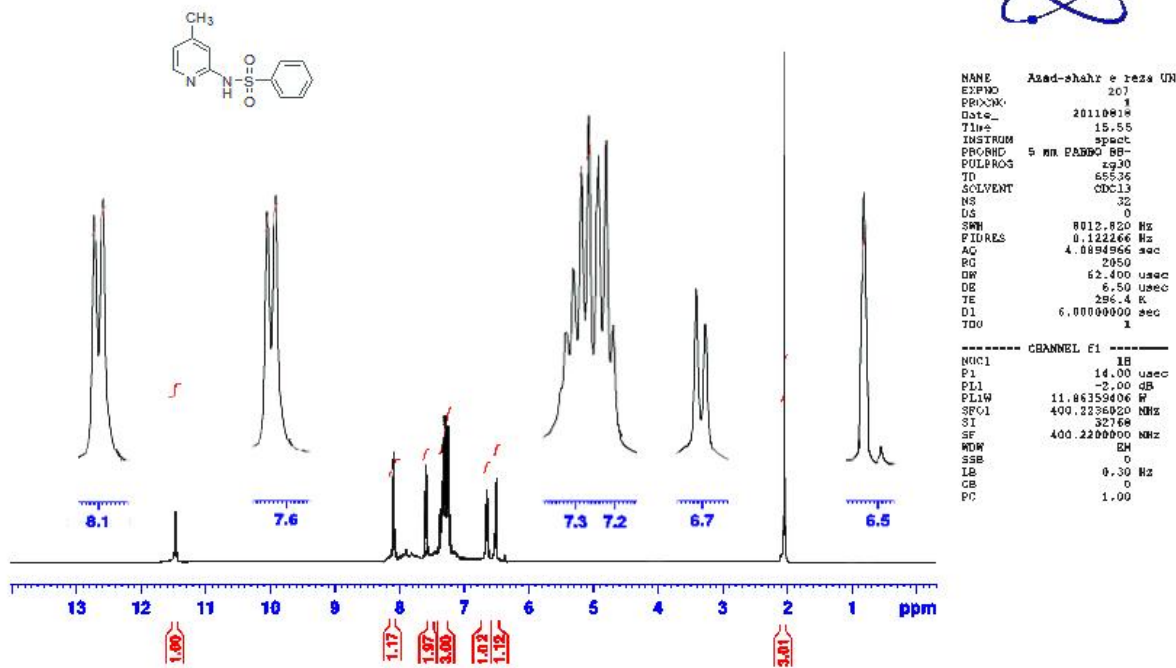



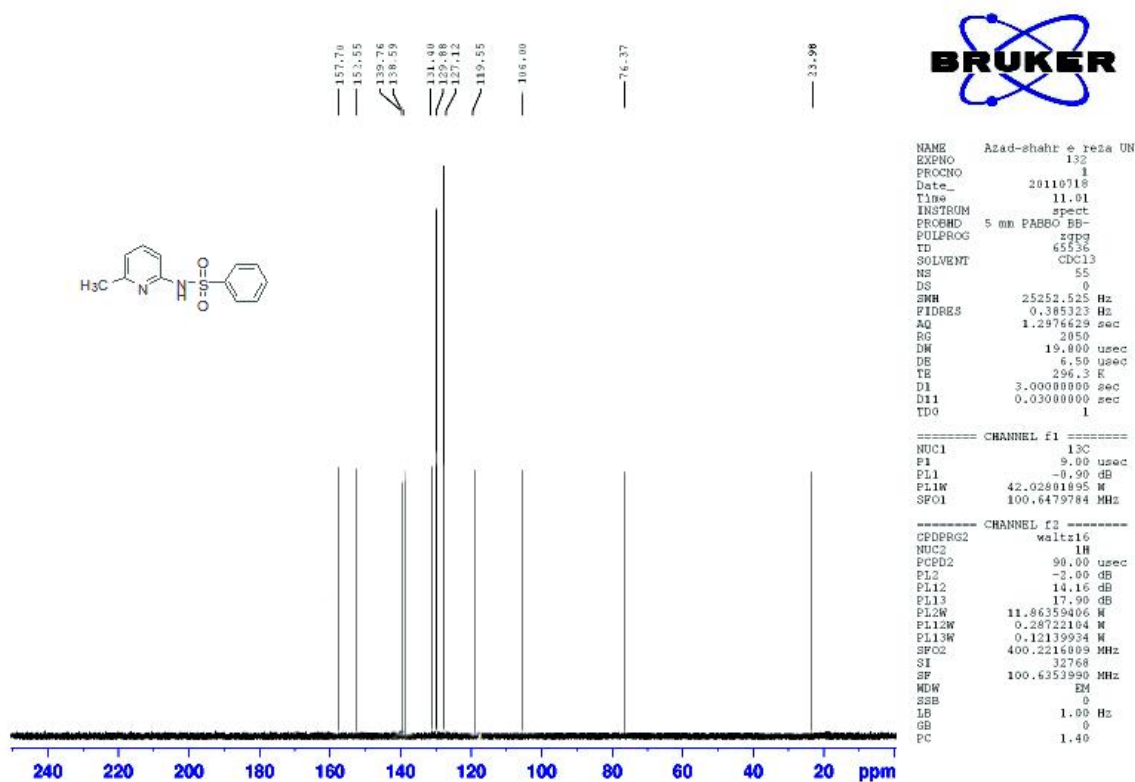

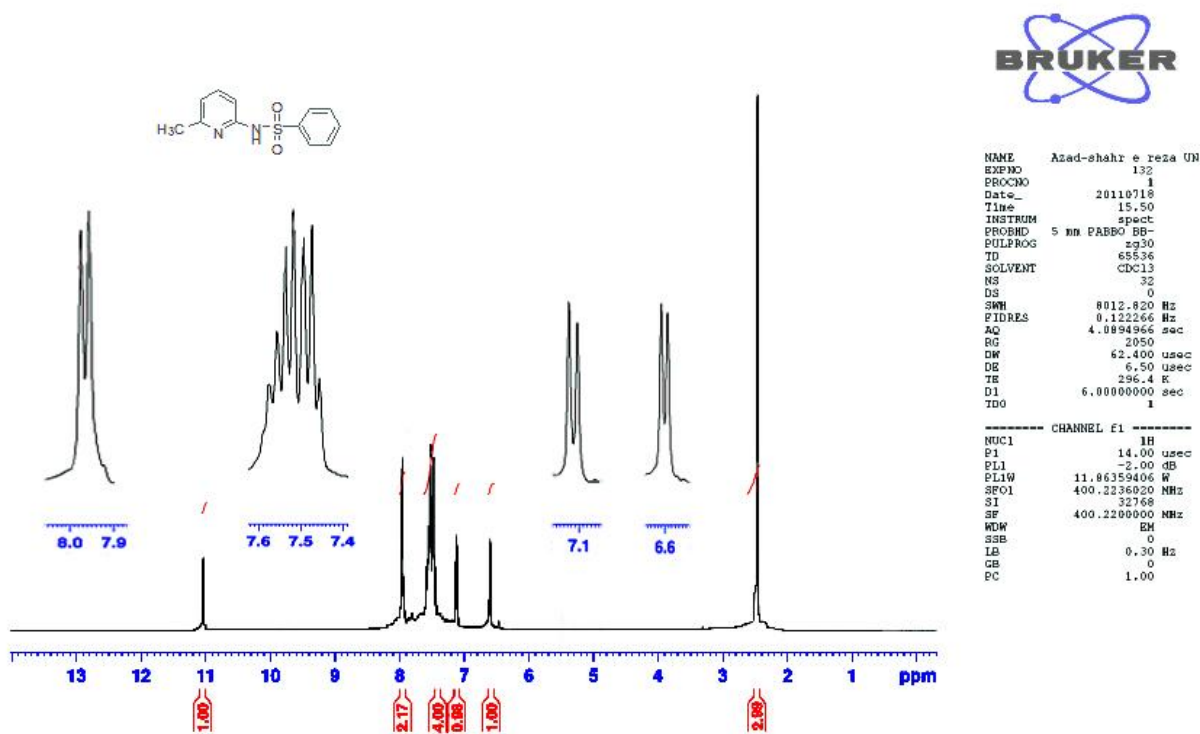

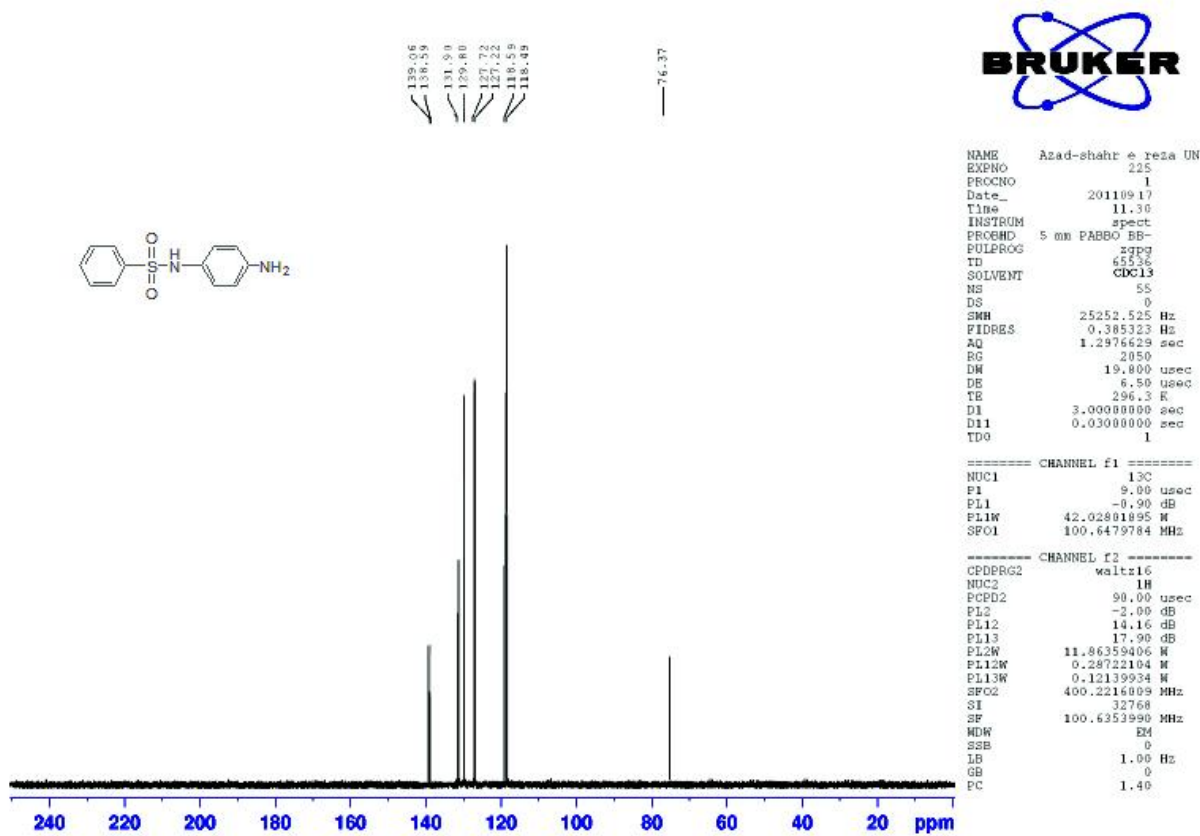

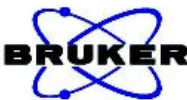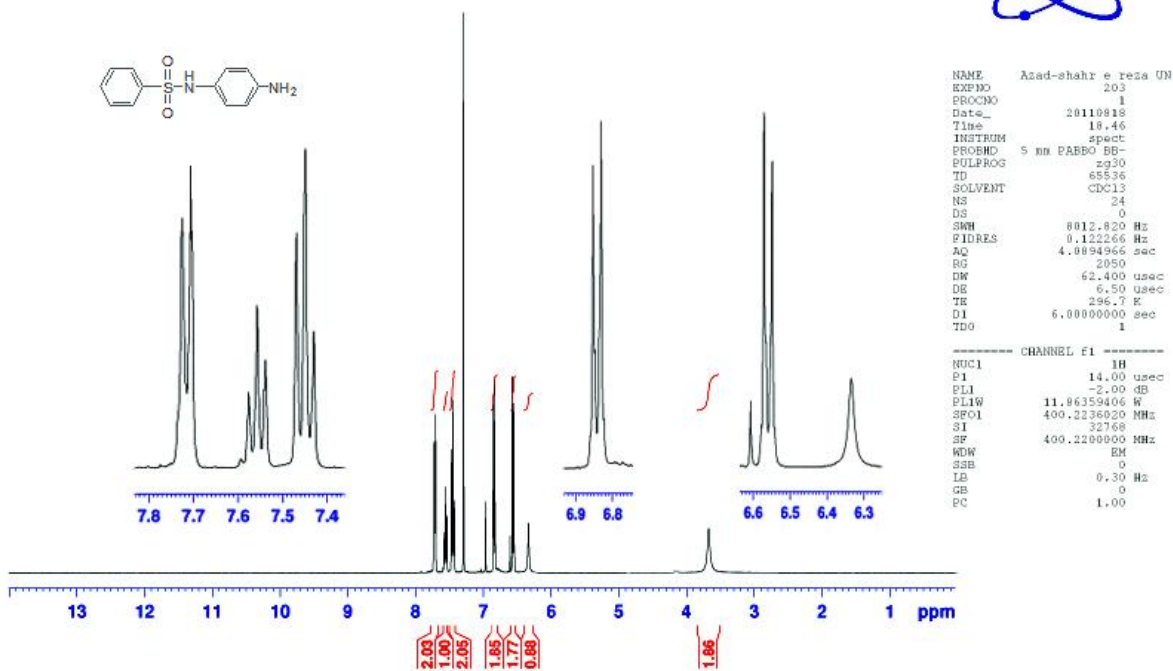

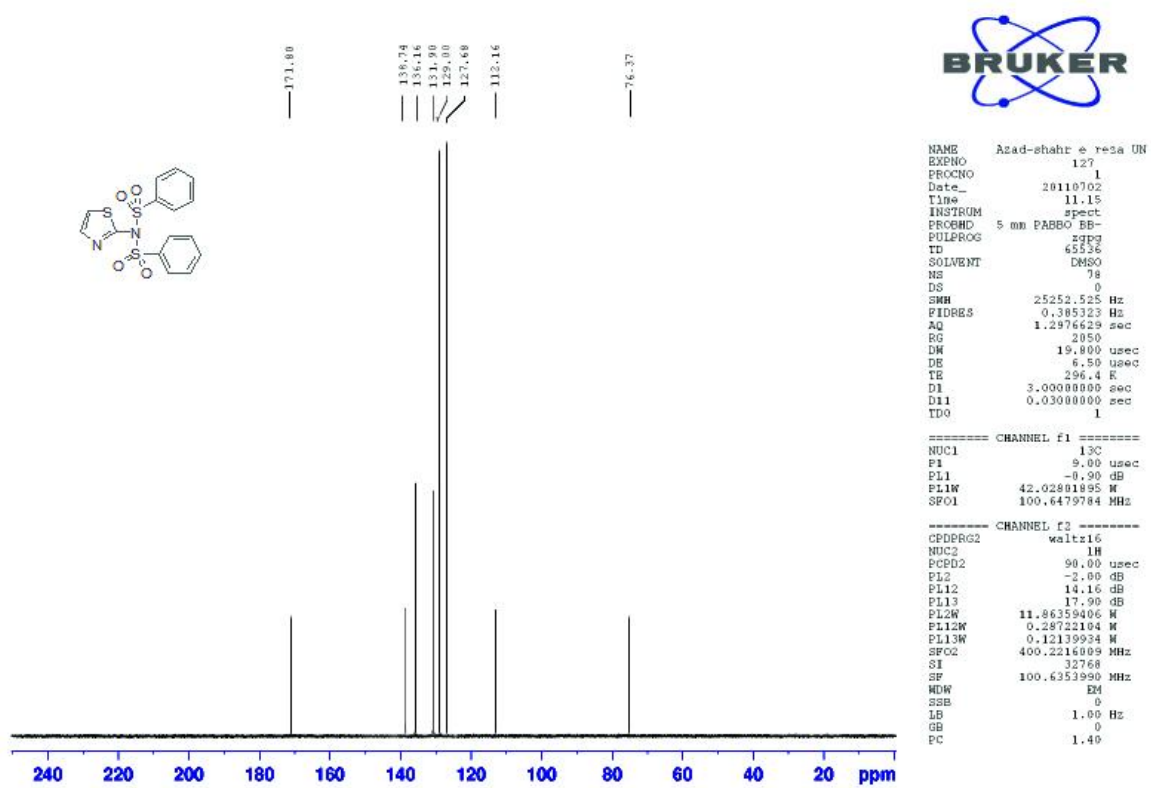

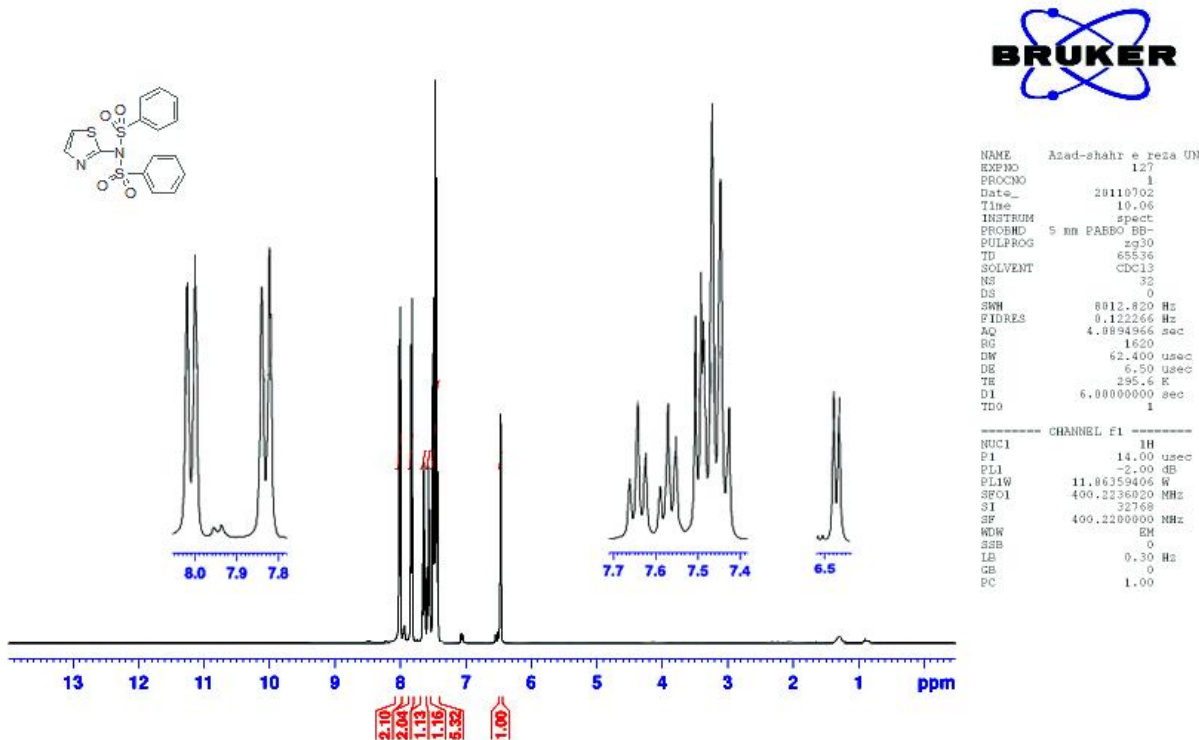

Supplement: c2ra20418e.pdf [file c2ra20418e.pdf]
